# Supplementary material for: Phenotypic Characteristics and Development of a Hospitalization Prediction Risk Score for Outpatients with Diabetes and COVID-19: The DIABCOVID Study
Source: PubMed Central journal article supplement (PMC7699790; doi:10.3390/jcm9113726), 2020-11-20
Supplement: jcm-09-03726-s001.pdf [file jcm-09-03726-s001.pdf]

Supplementary table 1:

Table 1. Main Characteristics of Patients with Diabetes Hospitalized in APHM during Summer 2020 (from 20<sup>th</sup> of August to 20<sup>th</sup> of September) just before the Recrudescence of the Epidemic Second Wave).

|                          |              |
|--------------------------|--------------|
| Age (years)              | 69 [62 – 81] |
| - < 55 (n, %)            | 18 (13.6)    |
| - 55-64 (n, %)           | 23 (17.4)    |
| - 65-74 (n, %)           | 40 (30.3)    |
| - ≥ 75 (n, %)            | 51 (38.6)    |
| Sex (n, % M)             | 80 (60.1)    |
| Type 2 Diabetes (n, %)   | 128 (97.0)   |
| Hypertension (n, %)      | 88 (66.7)    |
| Insulin treatment (n, %) | 32 (24.2)    |
| Oxygen Saturation (n, %) |              |
| - ≥ 95%                  | 43 (32.6)    |
| - < 95%                  | 89 (67.4)    |
